1 **A novel defective recombinant porcine enterovirus G virus carrying a**  
2 **porcine torovirus papain-like cysteine protease gene and a putative anti-**  
3 **apoptosis gene in place of viral structural protein genes**

4  
5  
6 Ryo Imai<sup>1</sup>, Makoto Nagai<sup>2\*</sup>, Shoichi Sakaguchi<sup>1,3</sup>, Tsuneyuki Masuda<sup>4</sup>, Moegi Kuroda<sup>4</sup>, Mami Oba<sup>1</sup>,  
7 Yukie Katayama<sup>1</sup>, Yuki Naoi<sup>1</sup>, Shinobu Tsuchiaka<sup>1</sup>, Tsutomu Omatsu<sup>1</sup>, Hiroshi Yamazato<sup>4</sup>, Shinji  
8 Makino<sup>5</sup> and Tetsuya Mizutani<sup>1\*</sup>

9  
10 <sup>1</sup> Research and Education Center for Prevention of Global Infectious Disease of Animal, Tokyo  
11 University of Agriculture and Technology, Fuchu, Tokyo, Japan

12  
13 <sup>2</sup> Azabu University, Sagamihara, Kanagawa, Japan

14  
15 <sup>3</sup> Osaka Medical College, Osaka, Japan

16  
17 <sup>4</sup> Kurayoshi Livestock Hygiene Service Center, Kurayoshi, Tottori, Japan

18  
19 <sup>5</sup> Department of Microbiology and Immunology, The University of Texas Medical Branch at Galveston,  
20 Galveston, Texas, The United States of America.

21  
22 \*Corresponding author

23 Tetsuya Mizutani,

24 Research and Education Center for Prevention of Global Infectious Diseases of Animals, Tokyo

25 University of Agriculture and Technology, 3-5-8 Saiwai-cho, Fuchu-shi, Tokyo 183-8509, Japan

26 Tel.: +81 42-367-5749

27 Fax: +81 42-367-5742

28 E-mail address: tmizutan@cc.tuat.ac.jp

29  
30 Makoto Nagai

31 Azabu University, Sagamihara, Kanagawa, 252-5201, Japan. E-mail address: m-nagai@azabu-

32 u.ac.jp. E-mail address: m-nagai@cc.tuat.ac.jp

33

## 34 Abstract

35 Enterovirus G (EV-G) belongs to the family of *Picornaviridae*. Two types of recombinant porcine  
36 EV-Gs carrying papain-like cysteine protease (PLCP) gene of porcine torovirus, a virus in  
37 *Coronaviridae*, are reported. Type 1 recombinant EV-Gs are detected in pig feces in Japan, USA,  
38 and Belgium and carry the PLPC gene at the junction site of 2C/3A genes, while PLPC gene  
39 replaces the viral structural genes in type 2 recombinant EV-G detected in pig feces in a Chinese  
40 farm. We identified a novel type 2 recombinant EV-G carrying the PLCP gene with flanking  
41 sequences in place of the viral structural genes in pig feces in Japan. The ~0.3 kb-long upstream  
42 flanking sequence had no sequence homology with any proteins deposited in GenBank, while the  
43 downstream ~0.9 kb-long flanking sequence included a domain having high amino acid sequence  
44 homology with a baculoviral inhibitor of apoptosis repeat superfamily. The pig feces, where the  
45 novel type 2 recombinant EV-G was detected, also carried type 1 recombinant EV-G. Although the  
46 phylogenetic analysis suggested that these two recombinant EV-Gs have independently evolved,  
47 type 1 recombinant EV-G might have served as a helper virus by providing viral structural proteins  
48 for dissemination of the type 2 recombinant EV-G.

49

50 Key Words: enterovirus, torovirus, recombination

51

## 52 Introduction

53 Enterovirus G (EV-G) is an enveloped RNA virus, belonging to the family of *Picornaviridae*.  
54 More than 20 types of EV-G, known as EV-G1 to EV-G20, have been identified [1,2]. The viral  
55 genome is a single-stranded and positive-sense polarity and consisted of the 5' untranslated regions  
56 (5' UTR), one open reading frame (ORF), 3' UTR and the 3' end poly(A) sequence. In infected cells,  
57 one polyprotein is translated from the ORF and then processed to 4 structural proteins (VP1, VP2,  
58 VP3, VP4) and 7 nonstructural proteins (2Apro, 2B, 2C, 3A, 3B, 3Cpro, 3Dpol) via viral proteinases,  
59 2A and 3CD.

60 By using a metagenomics approach, we have detected the genomes of EV-G1, 2, 3, 4, 6, 9, 10  
61 and a new type of EV-Gs in feces of pigs with or without diarrhea in Japan [3]. Among them, 16  
62 isolates of EV-G1 and one isolate of EV-G2 show an insertion of a papain-like cysteine protease  
63 (PLCP) gene from porcine torovirus at the 2C-3A junction sites [4] (Fig. 1A). We call them type 1  
64 recombinant EV-G in this study. Our previous data demonstrate high prevalence of type 1  
65 recombinant EV-G in the EV-G population. Type 1 recombinant EV-Gs have been discovered from  
66 feces of neonatal pigs showing clinical symptoms, such as diarrhea, in the US and Belgium [5,6,7],  
67 while type 1 recombinant EV-Gs identified in Japan are detected from normal as well as diarrhea  
68 pig feces [4]. In addition to type 1 recombinant EV-G, second type of recombinant EV-G (type 2  
69 recombinant EV-G), which carried the PLCP gene in place of viral structural genes, has been  
70 identified in a Chinese pig farm [8].

71 The PLCP gene is encoded in the ORF1 of the genome of torovirus, a member of family  
72 *Coronaviridae*, and the order *Nidovirales* [3,5-9]. The PLCP of nidoviruses serves as a protease to  
73 cleave viral gene 1 polyproteins to mature proteins [9]. It also has deubiquitinating and de-  
74 interferon stimulated gene removing enzyme (deISGylation) functions [5], which plays important  
75 roles in viral pathogenesis by acting as an innate immunity antagonist.

76 In the present study, we identified a novel type 2 recombinant EV-G in pig feces in Japan. In  
77 contrast to type 2 recombinant EV-G detected in the Chinese pig farm [8], the novel type 2  
78 recombinant EV-G had an insertion of PLCP with flanking genes, one of which had a region  
79 showing high homology with a baculovirus gene having anti-apoptotic function.

80

## 81 **Materials and Methods**

### 82 **Metagenomic analysis**

83 Analysis of metagenomics data of RNAs of pig feces was reported previously [3]. We performed  
84 further analyses using the same metagenomics data and RNA samples.

85

## 86 **Long RT-PCR**

87 RNAs were re-extracted from the pig feces using High Pure Viral Nucleic Acid Kit (Roche), and  
88 cDNA was synthesized with random primers using SuperScript III First-Strand Synthesis System  
89 (Invitrogen), as describes previously [4]. Primers for PCR (Table 1) were designed to amplify the  
90 viral genome at approximately every 1 kb with overlap regions. PCR was performed by using GoTaq  
91 Master Mixes (Promega) with the following conditions: an initial denaturation at 95 °C for 2 min;  
92 followed by 35 cycles of 95 °C for 30 s, 55 °C for 30 s, and 72 °C for 1 min; and a final extension at  
93 72°C for 5 min. We performed direct sequence analysis of the PCR products, which had been  
94 purified by agarose gel electrophoresis.

95

## 96 **Genome analysis**

97 Nucleotide sequences were first subjected to a multiple sequence alignment using Clustal W [10]  
98 in MEGA 7 [11]. Evolutionary distance was estimated with the Kimura's two parameter model [12].  
99 Phylogenetic analyses were performed by the neighbor-joining method [13] using MEGA 7.

100

## 101 **Results**

### 102 **Discovery of a novel type 2 recombinant EV-G in pig feces**

103 Our previous metagenomics analyses of RNAs extracted from pig feces obtained from  
104 Japanese pig farms have identified various types of EV-Gs and type 1 recombinant EV-G [4].  
105 Subsequent metagenomics analysis of the RNAs of the non-diarrheal pig feces obtained from a pig  
106 farm in Tottori prefecture, Japan, led to discovery of a novel type 2 recombinant EV-G genome  
107 (GenBank with accession number LC316774). This fecal sample also contains type 1 recombinant  
108 EV-G (EVG/Porcine/JPN/MoI2-1-1/2015/G1-Type 1) [4]. In contrast to the reported type 2  
109 recombinant EV-G genome in China, which carries the PLCP gene of pig torovirus in place of viral  
110 structural genes [8], the newly identified type 2 recombinant EV-G (EVG/Porcine/JPN/MoI2-1-

111 2/2015) carried the PLCP gene from pig torovirus plus ~0.3 kb-long upstream and ~0.9 kb-long  
112 downstream flanking sequences (Fig. 1B).

113 To confirm the genome sequence of the newly identified type 2 recombinant EV-G obtained by  
114 metagenomics analysis, we performed long RT-PCR to amplify the viral genome approximately  
115 every 1 kb with overlapping regions and subjected the PCR products for direct sequencing (Fig. 1B).  
116 These analyses revealed that the new type 2 recombinant EV-G genome was approximately 6.7 kb-  
117 long and had the following gene order: 5' UTR - unique region 1 - PLCP – unique region 2 – 2A – 2B  
118 – 2C – 3A – 3B – 3C – 3D – 3' UTR (Fig. 1B). The new type 2 recombinant EV-G genome carried a  
119 single ORF, suggesting that translation of the viral polyprotein starts at the translational start  
120 codon (ATG) at the 5' end of the unique region 1 and ends at the stop codon (TAA) of 3D gene. In  
121 addition to the replacement of the structural genes with the PLCP gene carrying flanking regions,  
122 the newly identified type 2 recombinant EV-G lacked 11 amino acids at the N-terminal of 2A  
123 protein. We noted that the same 11 amino acids are also deleted in type 2 recombinant EV-G  
124 detected in the pig farm in China [8]. In contrast, the N-terminal truncation of the 2A proteinase  
125 gene did not occur in type 1 recombinant and non-recombinant EV-Gs (data not shown), implying  
126 that the truncated 2A may be a specific characteristic feature among type 2 recombinant EV-Gs.  
127 Furthermore, type 2 recombinant EV-Gs lacked GxCG motif in 2A, which is considered to form part  
128 of the active site of the protease and is conserved among enteroviruses [14]. In contrast all type 1  
129 recombinant EV-Gs carry this motif in 2A (data not shown). Fig. 1C showed amino acid sequences  
130 at the junction sites of the unique region 1, PLCP gene, unique region 2, and the 2A lacking the N-  
131 terminal 11 amino acids [14].

132

### 133 **Unique regions of type 2 recombinant EV-G**

134 An internal region (amino acids 180-240) of the 304 amino acid-long unique region 2 of the  
135 newly identified type 2 recombinant EV-G showed high amino acid homology with genes of  
136 baculoviral inhibitor of apoptosis repeat (BIR) superfamily (Fig. 2). In contrast, unique region 1 and

137 other regions in unique region 2 showed no significant amino acid homologies with any known  
138 proteins.

139

#### 140 **Phylogenetic analysis of type 2 recombinant EV-G**

141 Phylogenetic analysis showed that PLCP, 2A, 2B, 2C, 3C and 3D genes of the newly identified  
142 type 2 EV-G made different clusters from known non-recombination EV-Gs and type 1 recombinant  
143 EV-Gs (Fig. 3A to 3F), including type 1 recombinant EV-G, which co-existed with the new type 2  
144 recombinant type 2 in the same feces; type 1 shown in blue and type 2 shown in red were found in  
145 the same feces used in this study. These data suggest that the type 2 recombinant EV-G was not  
146 directly derived from known type 1 recombinant EV-Gs or non-recombinant EV-Gs. We also noted  
147 that the new type 2 recombinant EV-G had the 247 nt-long 3' UTR (data not shown), which was  
148 substantially longer than 40 to 165 nt-long 3' UTR of most of picornaviruses, supporting the notion  
149 that the new type 2 recombinant EV-G has evolved independently from type 1 recombinant EV-Gs  
150 or non-recombinant EV-Gs.

151

#### 152 **Discussion**

153 In the present study, we reported the genome of a novel type 2 recombinant EV-G from pig  
154 feces in Japan. The newly identified type 2 recombinant EV-G lacked the genes for structural  
155 proteins, while it carried most of the genes encoding viral nonstructural proteins. Accordingly, this  
156 defective recombinant EV-G required helper virus, which should provide viral structural proteins  
157 for dissemination, and underwent RNA replication in the absence of helper virus. Because the 1  
158 recombinant EV-G was detected in the same feces sample [3] as the new type 2 recombinant EV-G,  
159 this type 1 recombinant EV-G, which belongs to different subtype, might have served as the helper  
160 virus.

161 Some RNA viruses acquire a new function, e.g., inhibition of the host immune functions, by  
162 gaining a new gene via RNA-RNA recombination [14,15]. Enteroviruses are genetically and

163 antigenically highly variable due to recombination within as well as between serotypes  
164 [16,17]. Poliovirus and coxsackievirus undergo RNA recombination, with higher efficiency for non-  
165 homologous RNA recombination than homologous RNA recombination, in cell cultures, suggesting  
166 that non-homologous RNA recombination may be a transient and intermediate step for the  
167 generation and selection of the fittest homologous recombinants [18]. Identification of two different  
168 types of recombinant EV-G implied that non-homologous recombination between picornavirus RNA  
169 and non-picornavirus genes drives evolution of picornaviruses.

170         Although both type 2 and type 1 recombinant EV-Gs carry the PLCP gene derived from  
171 torovirus, location of the PLCP gene in the genome of the two recombinant EV-Gs differ (see Fig. 1A  
172 and 1B). As PLCP is known to have deISGylation activity [4], retention of torovirus PLCP gene in  
173 the two different recombinant EV-G types imply that the PLCP gene may suppress host innate  
174 immune functions, facilitating survival of these recombinant EV-Gs. The cluster of PLCP was  
175 different between recombinant EV-G type 1 and the newly identified recombinant EV-G type 2 (Fig.  
176 3A), suggesting that these two different types of EV-Gs acquired the PLCP by RNA recombination  
177 from different subtypes of toroviruses.

178         Unlike most of recombinant EV-Gs, the newly identified type 2 recombinant EV-G carried  
179 the unique region 2, which had a domain showing extensive amino acid homology with the BIR  
180 superfamily. The baculoviral inhibitor of apoptosis (IAP) protein facilitates viral replication by  
181 preventing apoptosis [19,20]. Generally, IAP proteins contain one to three BIR domains, which play  
182 an important role in the anti-apoptotic function. IAPs have a RING domain, which relates E3  
183 ubiquitin ligase activity for ubiquitination of target proteins degradation, at the C-terminal region  
184 [21,22,23]. Possibly, the BIR-like domain and the PLCP gene inhibited apoptosis and host innate  
185 immune function, respectively, leading to efficient replication of the newly identified type 2 EV-G.

186         One unanswered question in this study was whether the protein region translated from the  
187 non-picornaviral genes of the newly identified type 2 recombinant EV-G undergoes protein  
188 processing. Coronavirus PLCP cleaves the viral gene 1 polyproteins through recognition of a LXGG

189 motif [8], while PLCP of arterivirus, another nidovirus, recognizes sequence LIGG, TTGG or PSGG  
190 [8]. However, cleavage specificity of torovirus PLCP has not need identified. Accordingly, it is  
191 unclear whether the PLCP in the newly identified type 2 recombinant EV-G cleaves any regions in  
192 the protein region translated from the inserted foreign genes. Enterovirus 2A and 3CD cleave Y/G  
193 pair and Q/G pair, respectively [24], while these pairs were absent at junctions at unique region  
194 1/PLCP, PLCP/unique region 2 and unique region2/truncated 2A as well as within the putative  
195 polyprotein translated from the non-picornavirus sequences. Moreover, the absence of GxCG motif  
196 conserved in chymotrypsin-like protease in 2A of type 2 recombinant EV-Gs suggests that the 2A  
197 proteinase function of the type 2 recombinant EV-G 2A was most probably defective. As enterovirus  
198 2A induces cleavage in host proteins [24], absence of biologically active 2A potentially affect host  
199 environment, including translational status, and possibly affect viral gene expression. Taken  
200 together, it is unlikely that the protein region translated from the inserted foreign genes undergo  
201 processing by the truncated 2A and 3CD.If the torovirus PLCP does not induce a cleavage(s) into  
202 the polyprotein of the newly identified type 2 recombinant EV-G, a protein consisted of unique  
203 region 1, PLPC, unique region 2 and N-terminal truncated 2A, might have been accumulated in  
204 cells infected with the newly identified type 2 recombinant EV-G. If so, testing the deISGylation  
205 function and anti-apoptotic function of this putative protein would provide a clue as to a possible  
206 reason(s) for retention of these nonpicornavirus sequences in the type 2 recombinant EV-G.  
207 Alternatively, the putative polyprotein with the torovirus PLCP and the BIR domain may have  
208 another biological function that is important for replication of the newly identified type 2  
209 recombinant EV-G.

210

## 211 **Conclusions**

212 A novel type of recombinant enterovirus G (type 2 recombinant EV-G) was discovered in pig  
213 feces in Japan. This type 2 recombinant EV-G carried the PLCP torovirus gene with an upstream  
214 flanking gene of unknown function and a downstream flanking gene having putative anti-apoptosis



215 function, in place of the viral structural proteins. The phylogenetic analysis showed this type 2  
216 recombinant EV-G belonged to be a different cluster from the cluster of type 1 recombinant, all of  
217 which were detected in the same sample.

218

219

## 220 **Acknowledgements**

221 This study is supported by funding including JSPS KAKENHI 15K07718, and operating cost  
222 from Global Innovation Research of Tokyo University of Agriculture and Technology. We thank Dr.  
223 Jayne K. Makino for proofreading of the manuscript.

224

225

## 226 **Author Contributions**

227 **Conceptualization:** TM MN. SM.

228 **Data Curation:** RI. SS. MK. MO.

229 **Formal Analysis:** MN. YN. ST.

230 **Funding Acquisition:** TM NM.

231 **Investigation:** RI. SS. MK. MO. YK. YN. ST. TO. HY.

232 **Methodology:** TM. RI MN.

233 **Project Administration:** TM MN.

234 **Resources:** TM. SS. SM.

235 **Software:** SS. YN.

236 **Supervision:** SM TM NM.

237 **Validation:** RI. MN.

238 **Visualization:** HY. TO.

239 **Writing – Original Draft:** RI. TM. SM.

240 **Writing – Review & Editing:** SS SM TM MN.

241

## 242 **References**

- 243 [1] Anbalagan S, Hesse RA, Hause BM. First identification and characterization of porcine  
244 enterovirus G in the United States. *PLoS ONE*. 2014; 9: e97517.
- 245
- 246 [2] Zell R, Delwart E, Gorbalenya AE, Hovi T, King AQM, Knowles NJ, Lindberg AM, Pallansch  
247 MA, Palmenberg AC, Reuter G, Simmonds P, Skern T, Stanway G, Yamashita T. ICTV Report C.  
248 ICTV virus taxonomy profile: picornaviridae. *J. Gen. Virol.* 2017; 98: 2421–2422.
- 249
- 250 [3] Tsuchiaka S, Rahpaya SS, Otomaru K, Aoki H, Kishimoto M, Naoi Y, Omatsu T, Sano K,  
251 Okazaki-Terashima S, Katayama Y, Oba M, Nagai M, Mizutani T. Identification of a novel bovine  
252 enterovirus possessing highly divergent amino acid sequences in capsid protein. *BMC Microbiol.*  
253 2017; 17: 18.
- 254
- 255 [4] Tsuchiaka S, Naoi Y, Imai R, Masuda T, Ito M, Akagami M, Ouchi Y, Ishii K, Sakaguchi S,  
256 Omatsu T, Katayama Y, Oba M, Shirai J, Satani Y, Takashima Y, Taniguchi Y, Takasu M,  
257 Madarame H, Sunaga F, Aoki H, Makino S, Mizutani T, Nagai M. Genetic diversity and  
258 recombination of enterovirus G strains in Japanese pigs: High prevalence of strains carrying a  
259 papain-like cysteine protease sequence in the enterovirus G population. *PLoS One*. 2018; 13:  
260 e0190819.
- 261
- 262 [5] Shang P, Misra S, Hause B, Fang Y. A naturally occurring recombinant enterovirus expresses a  
263 torovirus deubiquitinase. *J. Virol.* 2017; 91: e00450-17
- 264
- 265 [6] Knutson TP, Velayudhan BT, Marthaler DG. A porcine enterovirus G associated with enteric  
266 disease contains a novel papain-like cysteine protease. *J. Gen. Virol.* 2017; 98: 1305-1310.
- 267
- 268 [7] Conceição-Neto N, Theuns S, Cui T, Zeller M, Yinda CK, Christiaens I, Heylen E, Van Ranst M,  
269 Carpentier S, Nauwynck HJ, Matthijssens J. Identification of an enterovirus recombinant with  
270 a torovirus-like gene insertion during a diarrhea outbreak in fattening pigs. *Virus Evol.* 2017; 3:  
271 vex024.
- 272
- 273 [8] Wang Y, Zhang W, Liu Z, Fu X, Yuan J, Zhao J, Lin Y, Shen Q, Wang X, Deng X, Delwart E,  
274 Shan T, Yang S. Full-length and defective enterovirus G genomes with distinct torovirus protease  
275 insertions are highly prevalent on a Chinese pig farm. *Arch Virol.* 2018; 163: 2471-2476.
- 276
- 277 [9] Mielech AM, Chen Y, Mesecar AD, Baker SC. Nidovirus papain-like proteases: Multifunctional  
278 enzymes with protease, deubiquitinating and deISGylating activities. *Virus Res.* 2014; 194: 184-190.

279

280 [10] Thompson JD, Higgins DG, Gibson TJ. Clustal W: improving the sensitivity of progressive  
281 multiple sequence alignment through sequence weighting, position-specific gap penalties and  
282 weight matrix choice. *Nucleic Acids Res.* 1994; 22: 4673–4680.

283

284 [11] Kumar S, Stecher G, Tamura K. MEGA7: Molecular Evolutionary Genetics Analysis version 7.0  
285 for bigger datasets. *Mol. Biol. Evol.* 2016; 33: 1870-1874.

286

287 [12] Kimura M. A simple method for estimating evolutionary rates of base substitutions through  
288 comparative studies of nucleotide sequences. *J. Mol. Evol.* 1980; 16: 111-120.

289

290 [13] Saitou N, Nei M. The neighbor-joining method: a new method for reconstructing phylogenetic  
291 trees. *Mol. Biol. Evol.* 1987; 4: 406–425.

292

293 [14] Gorbalenya AE, Donchenko AP, Blinov VM, Koonin EV. Cysteine proteases of positive strand  
294 RNA viruses and chymotrypsin-like serine proteases. A distinct protein superfamily with a common  
295 structural fold. *FEBS Lett.* 1989; 243: 103-114.

296

297 [15] Simon-Loriere E, Holmes EC. Why do RNA viruses recombine? *Nat Rev Microbiol.* 2011; 9: 617-  
298 626.

299

300 [16] Perez-Losada M, Arenas M, Galan JC, Palero F, Gonzalez-Candelas F. Recombination in  
301 viruses: mechanisms, methods of study, and evolutionary consequences. *Infect Genet Evol.* 2015; 30:  
302 296-307.

303

304 [17] Simmonds P, Welch J. Frequency and dynamics of recombination within different species of  
305 human enteroviruses. *J. Virol.* 2006; 80: 483-493.

306

307 [18] Lukashev AN. Recombination among picornaviruses. *Rev Med Virol.* 2010; 20: 327-337.

308

309 [19] Holmblat B, Jegouic S, Muslin C, Blondel B, Joffret ML, Delpeyroux F. Nonhomologous  
310 recombination between defective poliovirus and coxsackievirus genomes suggests a new model of  
311 genetic plasticity for picornaviruses. *MBio.* 2014; 5: e01119-757 14.

312

313 [20] Clem RJ, Miller LK. Control of programmed cell death by the baculovirus genes p35 and IAP.  
314 *Mol. Cell. Biol.* 1994; 14: 5212–5222.

315

316 [21] Crook NE, Clem RJ, Miller L. K. An apoptosis-inhibiting baculovirus gene with a zinc finger-

317 like motif. *J. Virol.* 1993; 67: 2168–2174.

318

319 [22] Ni T, Li W, Zou F. The ubiquitin ligase ability of IAPs regulates apoptosis. *IUBMB Life.* 2015;  
320 57: 779–785.

321

322 [23] Vaux DL, Silke J. IAPs, RINGs and ubiquitylation. *Nat. Rev. Mol. Cell Biol.* 2005; 6: 287–297.

323

324 [24] Morizane Y, Honda R, Fukami K, Yasuda H. X-linked inhibitor of apoptosis functions as  
325 ubiquitin ligase toward mature caspase-9 and cytosolic Smac/DIABLO. *J. Biochem.* 2005; 137: 125–  
326 132.

327

328

329 **Figure legends**

330 **Fig. 1. Schematic diagram of the genome organization of EV-G, type 1 (A) and type 2 recombinant**  
331 **EVGs (B).** (A) Genome order of EV-G and type 1 recombinant EV-G was drawn from strain of  
332 EVG/Porcine/JPN/MoI2-1-1/2015/G1-PL-CP reported in our previous study [3]. (B) Genome order of  
333 a newly identified type 2 EV-G (EVG/Porcine/JPN/MoI2-1-2/2015/type 2) is shown in the top. The  
334 sequence of the newly identified type 2 EV-G was confirmed by overlapping PCR. The PCR products  
335 were electrophoresed using agarose gel (shown in left bottom panel). Lane 1, 31F and  
336 1191R primers; lane 2, 930F and 1978R primers; lane 3, 1725F and 2760R primers; lane 4, 2500F  
337 and 3447R primers; lane 5, 3001F and 4188R primers; lane 6, 3921F and 4961R primers; lane 7,  
338 4818F and 5852R primers; lane 8, 5619F and 6694R primers in Table 1. (C) Amino acid sequences  
339 at junction sites of unique region 1-PLCP-unique region 2-N-terminal truncated 2A of  
340 EVG/Porcine/JPN/MoI2-1-2/2015/type 2.

341  
342 **Fig. 2. Amino acid alignment of unique region 2 and BIR family.**

343 Amino acid sequence of amino acids at 180-240 of unique region 2 of the newly identified type 2 EV-  
344 G is shown in top and is aligned with other BIR family protein. moi212uniq2 represents the newly  
345 identified type 2 EV-G. The accession number of protein sequences from GenBank used in this  
346 figure is indicated as XP\_004837139.1: baculoviral IAP repeat-containing protein 8-like of  
347 Heterocephalus glaber, XP\_020040963.1: E3 ubiquitin-protein ligase XIAP of Castor canadensis,  
348 XP\_021484438.1: E3 ubiquitin-protein ligase XIAP of Meriones unguiculatus, XP\_023055645.1: E3  
349 ubiquitin-protein ligase XIAP of Piliocolobus tephrosceles, XP\_023590042.1: E3 ubiquitin-protein  
350 ligase XIAP isoform X2 of Trichechus manatus latirostris, XP\_020935024.1: E3 ubiquitin-protein  
351 ligase XIAP isoform X1 of Sus scrofa, XP\_004480589.1: E3 ubiquitin-protein ligase XIAP of Dasypus  
352 novemcinctus, XP\_024602944.1: E3 ubiquitin-protein ligase XIAP isoform X2 of Neophocaena  
353 asiaeorientalis asiaeorientalis, XP\_022417552.1: E3 ubiquitin-protein ligase XIAP isoform X1 of  
354 Delphinapterus leucas, NP\_001164796.1: E3 ubiquitin-protein ligase XIAP of Oryctolagus

355 cuniculus, XP\_007111017.1: E3 ubiquitin-protein ligase XIAP isoform X1 of *Physeter catodon*,  
356 XP\_020140715.1: E3 ubiquitin-protein ligase XIAP isoform X3 of *Microcebus murinus*, EPY73910.1:  
357 Baculoviral IAP repeat-containing protein 4 of *Camelus ferus*, EGW11922.1: Baculoviral IAP  
358 repeat-containing protein 4 of *Cricetulus griseus*, NP\_001271387.1: E3 ubiquitin-protein ligase  
359 XIAP of *Canis lupus familiaris*, XP\_013003432.1: E3 ubiquitin-protein ligase XIAP of *Cavia*  
360 *porcellus*, XP\_008068909.1: E3 ubiquitin-protein ligase XIAP of *Carlito syrichta*, AAB58376.1: X-  
361 linked inhibitor of apoptosis of *Mus musculus*, OWJ99336.1: XIAP of *Cervus elaphus hippelaphus*,  
362 XP\_023363885.1: E3 ubiquitin-protein ligase XIAP of *Otolemur garnettii*.

363

364 **Fig. 3. Phylogenetic trees of EVG/Porcine/JPN/MoI2-1-2/2015/type 2 with enterovirus G strains**  
365 **from GenBank database based on nucleotide sequences of (A) PLCP, (B) 2A, (C) 2B, (D) 2C, (E) 3C,**  
366 **and (F) 3D coding regions.** The trees were constructed using Neighbor-joining method in MEGA  
367 7.0.14 and bootstrap test (n-1000). The genetic distance was calculated using Kimura's two  
368 parameter model. The scale bar indicates nucleotide substitutions per site.

369

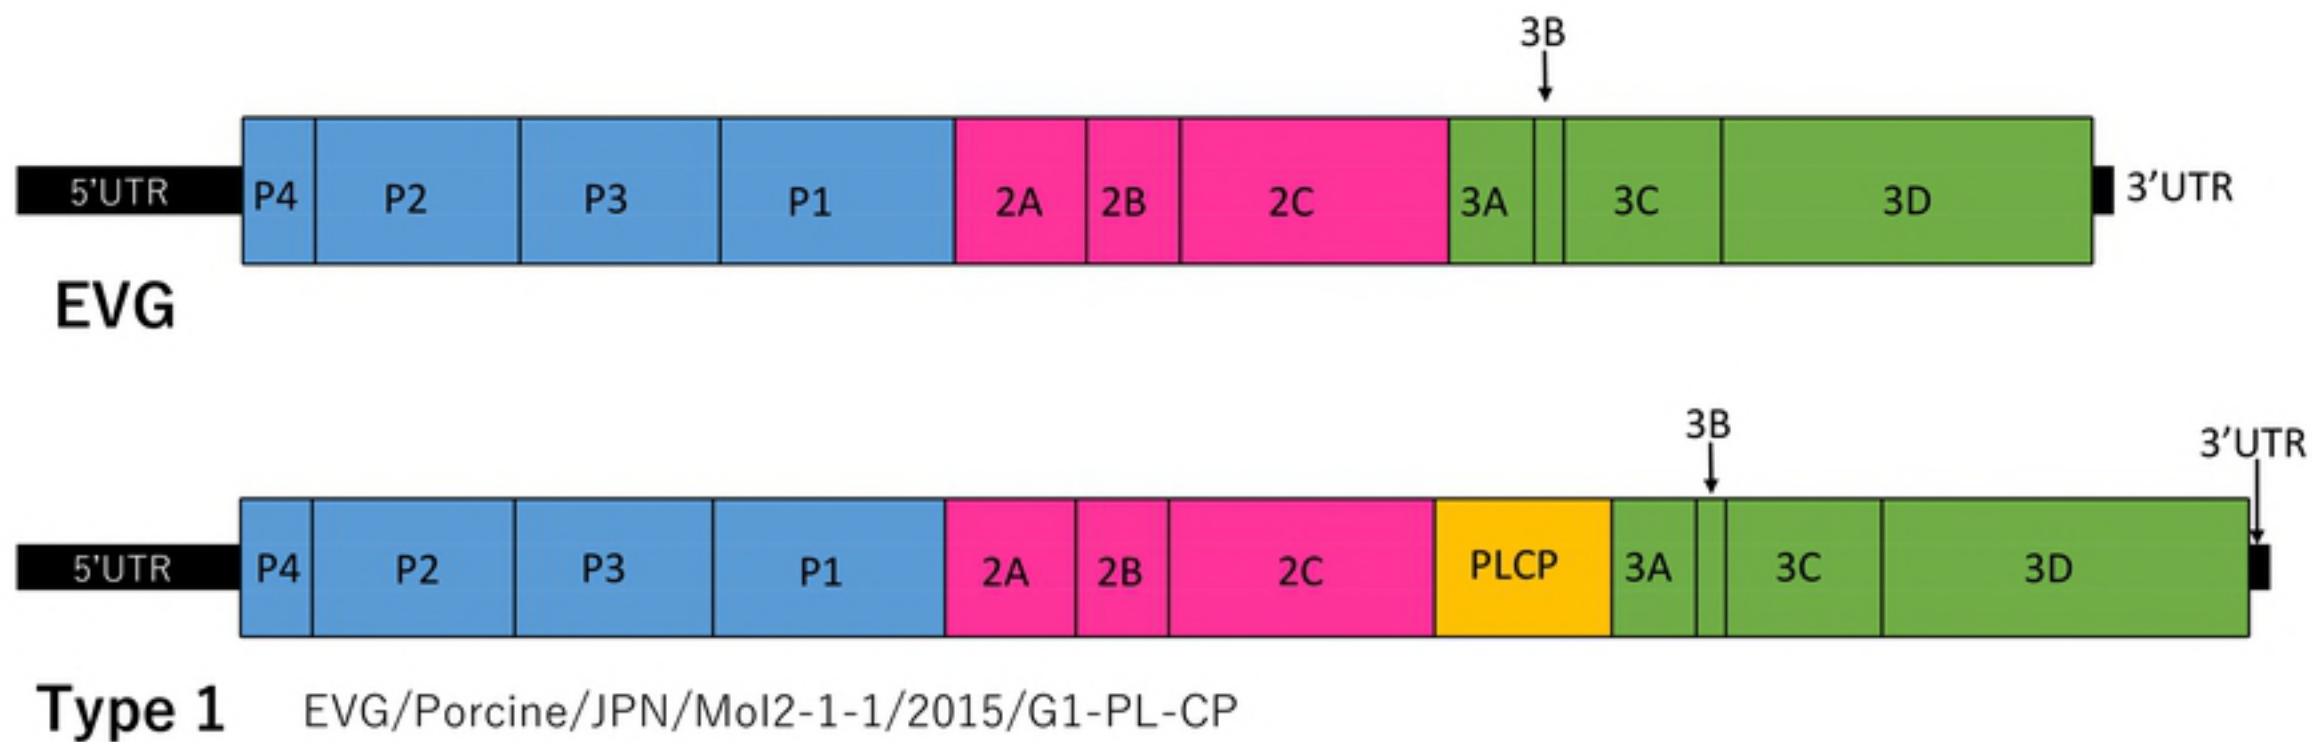

Fig. 1A Imai et al

Table 1. Primers for overlapping PCR

| Primer name | Nucleotide sequences (5' to 3' ) | nucleotide number |
|-------------|----------------------------------|-------------------|
| F 1         | CAACCTGGCGCTAGTACAC              | 31-49             |
| R 1         | TGCACAGATTGTTCTTTGGTAG           | 1170-1191         |
| F 2         | CCACTCTAACTAAAGAAGGCGA           | 930-951           |
| R 2         | ATTGCCACTGGTGAGAGAC              | 1960-1978         |
| F 3         | ACACTCTTCCCTCAGGTTCTAA           | 1725-1746         |
| R 3         | GTGGAATAGTGTGCATCAGC             | 2741-2760         |
| F 4         | GCGGTCCAGCACTATTCAT              | 2500-2518         |
| R 4         | TGCTCTGTGGTTGGACAAG              | 3429-3447         |
| F 5         | CAACTATGCCAGTCAGCTTTC            | 3001-3021         |
| R 5         | TGGTTTCTCCTCTTCCATTCTG           | 4167-4188         |
| F 6         | CCCACTATATCCAATGGCAAAG           | 3920-3941         |
| R 6         | TCATAGTACGGTGGGTTGGA             | 4942-4961         |
| F 7         | AGTGAACCAATGAGGCTG               | 4835-4853         |
| R 7         | TCTGCAGTGCCTGAAACATTA            | 5832-5852         |
| F 8         | GCAGATTGATTGAAGCCTCC             | 5619-5638         |
| R 8         | AGTTTAGGCCAATCCGGATAAT           | 6673-6694         |
